# Supplementary material for: Analysis of the fecal microbiota of fast- and slow-growing rainbow trout (Oncorhynchus mykiss)
Source: BMC Genomics. 2019 Oct 29;20:788. doi: 10.1186/s12864-019-6175-2 (PMC6819385; doi:10.1186/s12864-019-6175-2)
Supplement: Supplementary file 5 — Additional file 5. Metadata file for fast and slow, Extraction technique . Detailed information regarding the fast and slow-growing fish samples (weight, length, sex, condition factor). [file 12864_2019_6175_MOESM5_ESM.xlsx]

## Sheet: 180810_metadata_fastslow
Group	extraction method	Growth rate	Gender	Weight(gm)	Length	Condition factor
Mobile_Feed	MoBio
Mobile_Inlet	MoBio
Mobile_Tank	MoBio
Promega_Inlet	Promega_Maxwell
Promega_feed	Promega_Maxwell
Promega_tank	Promega_Maxwell
fast1	Promega_Maxwell	Fast	male	1951.6	474	1.83
fast10	MoBio	Fast	male	2252	507	1.73
fast11	MoBio	Fast	female	2105.7	490	1.79
fast12	MoBio	Fast	male	2222.5	507	1.71
fast13	MoBio	Fast	male	2055.7	485	1.8
fast14	MoBio	Fast	female	2043.3	477	1.88
fast15	MoBio	Fast	male	2227	475	2.08
fast16	MoBio	Fast	male	2133.5	484	1.88
fast17	MoBio	Fast	male	1951.6	474	1.83
fast18	Phenol_Chloroform	Fast	male	2252	507	1.73
fast19	Phenol_Chloroform	Fast	female	2105.7	490	1.79
fast2	Promega_Maxwell	Fast	male	2252	507	1.73
fast20	Phenol_Chloroform	Fast	male	2222.5	507	1.71
fast21	Phenol_Chloroform	Fast	male	2055.7	485	1.8
fast22	Phenol_Chloroform	Fast	female	2043.3	477	1.88
fast23	Phenol_Chloroform	Fast	male	2227	475	2.08
fast24	Phenol_Chloroform	Fast	male	2133.5	484	1.88
fast3	Promega_Maxwell	Fast	female	2105.7	490	1.79
fast4	Promega_Maxwell	Fast	male	2222.5	507	1.71
fast5	Promega_Maxwell	Fast	male	2055.7	485	1.8
fast7	Promega_Maxwell	Fast	male	2227	475	2.08
fast8	Promega_Maxwell	Fast	male	2133.5	484	1.88
fast9	MoBio	Fast	male	1951.6	474	1.83
slow1	Promega_Maxwell	Slow	immature	893	355	2
slow11	MoBio	Slow	male	913.4	394	1.49
slow12	MoBio	Slow	female	1336.5	431	1.67
slow13	MoBio	Slow	female	1571.7	453	1.69
slow14	MoBio	Slow	female	1523	444	1.74
slow15	Phenol_Chloroform	Slow	immature	893	355	2
slow16	Phenol_Chloroform	Slow	male	908.7	375	1.72
slow17	Phenol_Chloroform	Slow	immature	1297.4	405	1.95
slow18	Phenol_Chloroform	Slow	male	913.4	394	1.49
slow19	Phenol_Chloroform	Slow	female	1336.5	431	1.67
slow2	Promega_Maxwell	Slow	male	908.7	375	1.72
slow20	Phenol_Chloroform	Slow	female	1571.7	453	1.69
slow21	Phenol_Chloroform	Slow	female	1523	444	1.74
slow3	Promega_Maxwell	Slow	immature	1297.4	405	1.95
slow4	Promega_Maxwell	Slow	male	913.4	394	1.49
slow5	Promega_Maxwell	Slow	female	1336.5	431	1.67
slow6	Promega_Maxwell	Slow	female	1571.7	453	1.69
slow7	Promega_Maxwell	Slow	female	1523	444	1.74
slow8	MoBio	Slow	immature	893	355	2
slow9	MoBio	Slow	male	908.7	375	1.72

## Sheet: ectraction_technique
Sample_ID	Extraction Method
MoBIO1	MoBIO
MoBIO2	MoBIO
MoBIO3	MoBIO
Promega1	Promega_Maxwell
Promega1	Promega_Maxwell
Promega1	Promega_Maxwell
Qiagen_blood1	Qiagen_Blood
Qiagen_blood2	Qiagen_Blood
Qiagen_blood3	Qiagen_Blood
Qiagen_stool1	Qiagen_Stool
Qiagen_stool2	Qiagen_Stool
Qiagen_stool3	Qiagen_Stool
phenol1	Phenol_Chloroform
phenol2	Phenol_Chloroform
phenol3	Phenol_Chloroform
